# Supplementary material for: SOX10: 20 years of phenotypic plurality and current understanding of its developmental function
Source: HighWire-hosted journal article supplement (doi:10.1136/jmedgenet-2021-108105), 2021-10-19
Supplement: jmedgenet-2021-108105supp001_data_supplement.pdf [file jmedgenet-2021-108105supp001_data_supplement.pdf]

| Variant                                  | Prediction on protein | Inheritance | Segregation          | Phenotype                                                                                                                              | Method    | Comments                                                   |
|------------------------------------------|-----------------------|-------------|----------------------|----------------------------------------------------------------------------------------------------------------------------------------|-----------|------------------------------------------------------------|
| Pathogenic or likely pathogenic variants |                       |             |                      |                                                                                                                                        |           |                                                            |
| c.-84-1G>C                               | p.?                   | sporadic    | de novo              | WS4 or PCWH (learning delay, hypotonia at birth; short segment HSCR)                                                                   | Sanger    |                                                            |
| c.44_62del                               | p.(Val15Alafs*11)     | ?           | ND                   | WS4                                                                                                                                    | Sanger    | Sun, <i>Sci Rep</i> 2016;6:35499                           |
| c.61del                                  | p.(Arg21Alafs*11)     | sporadic    | parents not carriers | PCW + olfactory bulbs agenesis                                                                                                         | Sanger    |                                                            |
| c.89C>A                                  | p.(Ser30*)            | familial    | cosegregates         | PCWH in index case and mother, isolated SNHL in sister                                                                                 | Sanger    | Cassatella, <i>Eur J Endocrinol</i> 2018;178:377           |
| c.236T>G                                 | p.(Val79Gly)          | familial    | de novo in father    | PCWH (index case : demyelinating neuropathy, SNHL ; son : peripheral neuropathy + HSCR + depigmentation, hearing is said to be normal) | Sanger    |                                                            |
| c.255G>A                                 | p.(Trp85*)            | sporadic    | de novo              | WS4 (long segment HSCR)                                                                                                                | Sanger    | Sun, <i>Sci Rep</i> 2016;6:35498                           |
| c.325A>T                                 | p.(Asn109Tyr)         | sporadic    | de novo              | WS2 + anosmia                                                                                                                          | Sanger    |                                                            |
| c.331T>C                                 | p.(Phe111Leu)         | sporadic    | ND                   | WS2 or PCW (motor delay and ID), anosmia and hypoplastic olfactory bulbs                                                               | Sanger    | Liu, <i>Int J Pediatr Otorhinolaryngol</i> 2019;130:109806 |
| c.333C>A                                 | p.(Phe111Leu)         | sporadic    | parents not carriers | WS2                                                                                                                                    | NGS panel |                                                            |
| c.335T>C                                 | p.(Met112Thr)         | sporadic    | de novo              | WS2 + vestibular areflexia                                                                                                             | NGS panel |                                                            |
| c.335T>C                                 | p.(Met112Thr)         | familial    | de novo in mother    | WS4 in 2 index case brothers (short segment HSCR), WS2 in mother                                                                       | Sanger    |                                                            |
| c.335_336del                             | p.(Met112Serfs*21)    | sporadic    | parents not carriers | WS2 + vestibular areflexia                                                                                                             | Sanger    |                                                            |
| c.338T>C                                 | p.(Val113Ala)         | familial    | cosegregates         | WS4 in 2 index case brothers , one has a possible hypogonadism; a third brother has SNHL; father has WS2                               | NGS panel |                                                            |
| c.341G>A                                 | p.(Trp114*)           | sporadic    | parents not carriers | WS4                                                                                                                                    | NGS panel |                                                            |
| c.342G>A                                 | p.(Trp114*)           | familial    | ?                    | WS2                                                                                                                                    | sanger    |                                                            |
| c.342G>T                                 | p.(Trp114Cys)         | sporadic    | de novo              | WS2 + mild hypotonia                                                                                                                   | sanger    |                                                            |
| c.355C>G                                 | p.(Arg119Gly)         | sporadic    | parents not carriers | WS2                                                                                                                                    | Sanger    |                                                            |
| c.356_357del                             | p.(Arg119Glnfs*14)    | sporadic    | parents not carriers | WS2 or PCW, hyperpigmentation of hands                                                                                                 | Sanger    |                                                            |
